# Supplementary material for: Engineering dual-glycan responsive expression systems for tunable production of heterologous proteins in Bacteroides thetaiotaomicron
Source: PubMed Central journal article supplement (PMC6874557; doi:10.1038/s41598-019-53726-w), 2019-11-22

**Engineering dual-glycan responsive expression systems for tunable production of heterologous proteins in *Bacteroides thetaiotaomicron***

Darryl R. Jones<sup>1¶</sup>, Marshall B. Smith<sup>1,2¶</sup>, Richard McLean<sup>1</sup>, Julie M. Grondin<sup>1</sup>, Carolyn R. Amundsen<sup>1</sup>, G. Douglas Inglis<sup>1,2</sup>, L. Brent Selinger<sup>2</sup>, and D. Wade Abbott<sup>1,2\*</sup>

<sup>1</sup>Lethbridge Research and Development Centre, Agriculture and Agri-Food Canada, Lethbridge, Alberta, Canada, T1J 4B1

<sup>2</sup>Department of Biological Sciences, University of Lethbridge, Lethbridge, Alberta, Canada, T1K 3M4

**Figure S1: Comparison of NanoLuc activity from two different genomic loci.** pINT integrates NanoLuc into the vacant PUL75 locus. pNBU2 integrates NanoLuc, and the entire pNBU2 plasmid, into a tRNA<sup>ser</sup> locus. To demonstrate that genomic locus did not affect transgene expression, each recombinant pINT strain was compared to its pNBU2 counterpart. **(a)** NanoLuc activity under control of the P<sub>ON</sub> promoter when induced by GLC (black), DX (blue), or AG (yellow). **(b)** NanoLuc activity under control of the P<sub>DX</sub> promoter on varying concentrations of GLC and DX. **(c)** NanoLuc activity under control of the P<sub>AG</sub> promoter on varying concentrations of GLC and AG. **(d)** NanoLuc activity under control of the P<sub>DX</sub> promoter in modified SusR<sup>DX</sup> strains on GLC (black), DX (blue), or AG (yellow) or mixed DX and AG (green). **(e)** NanoLuc activity under control of the P<sub>AG</sub> promoter in modified HTCS<sup>AG</sup> strains on GLC (black), DX (blue), or AG (yellow) or mixed DX and AG (green). **(f)** NanoLuc activity under control of either P<sub>DX</sub> or P<sub>AG</sub> in strains with modified SusR<sup>DX</sup> and HTCS<sup>AG</sup> on GLC (black), DX (blue), or AG (yellow) or mixed DX and AG (green). Significant differences are indicated with brackets. Lack of brackets indicates no significant difference. 32/48 (67%) of comparisons between the two loci do not result in statistically significant difference. Asterisks represent level of significance (\*= p < 0.05, \*\*= p < 0.01, \*\*\*= p < 0.001).

**Figure S2: Schematic regulatory maps of strains engineered in this study.** Promoters (colored arrows) are placed upstream of open reading frames (pointed rectangles) on the genome. Blue arrow = dextran responsive (bt3091), yellow arrow = arabinogalactan responsive (bt0268). Regulatory proteins (rounded boxes) are induced by carbohydrates and effect downstream expression of reporter proteins.

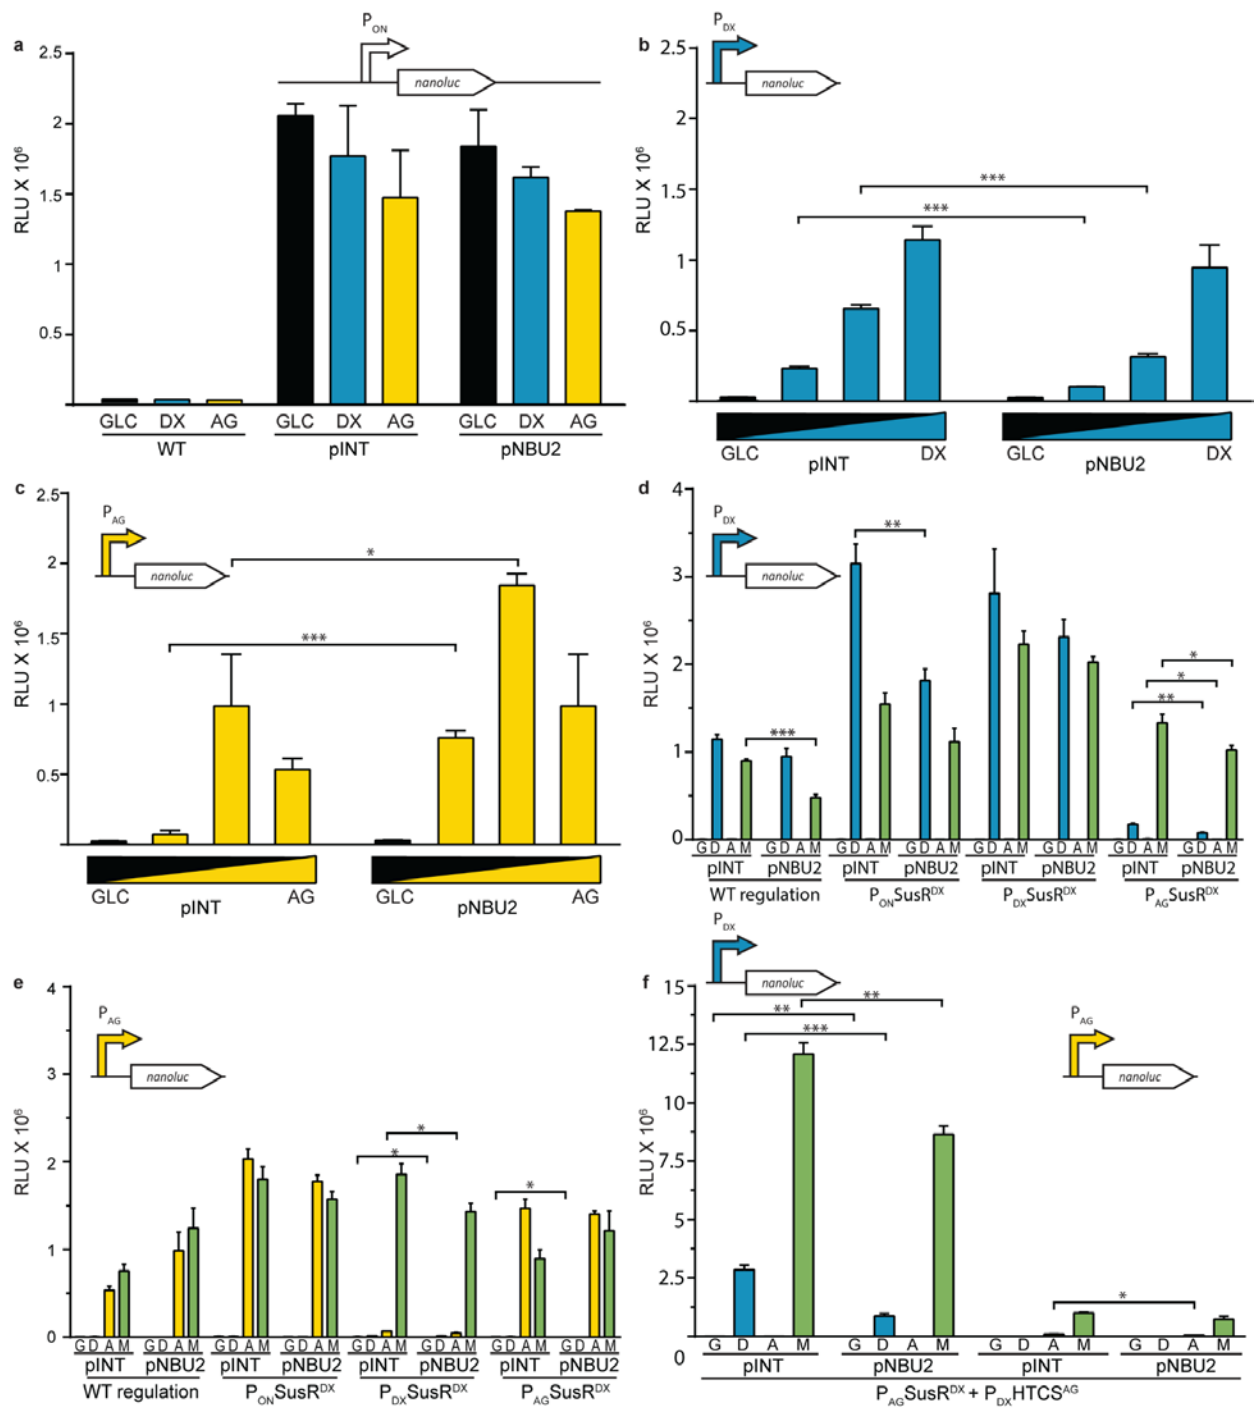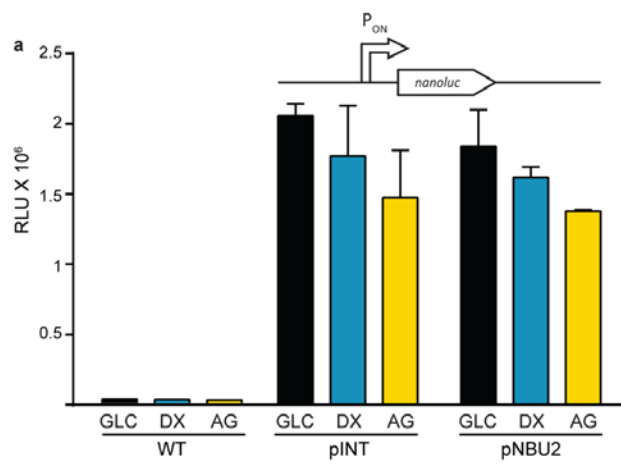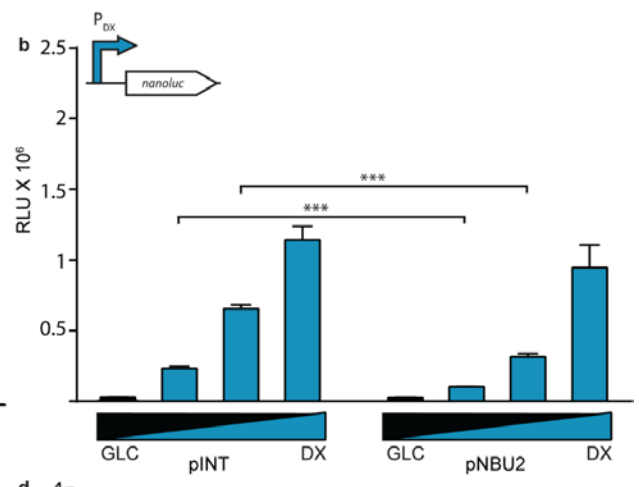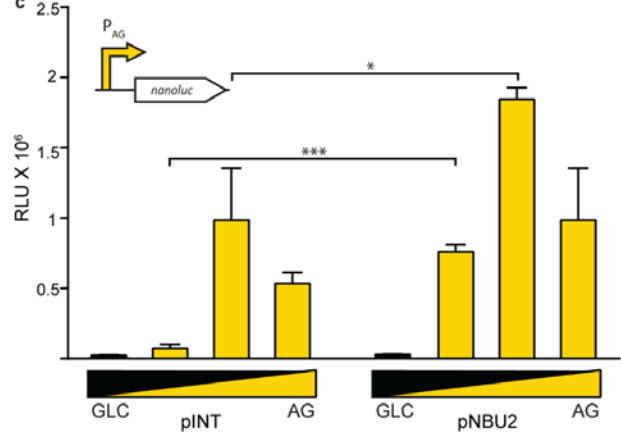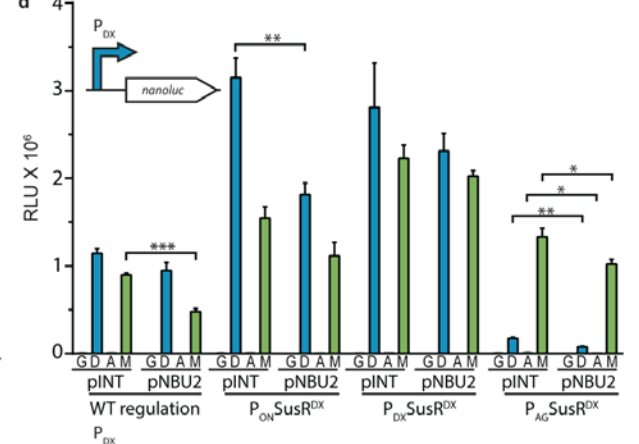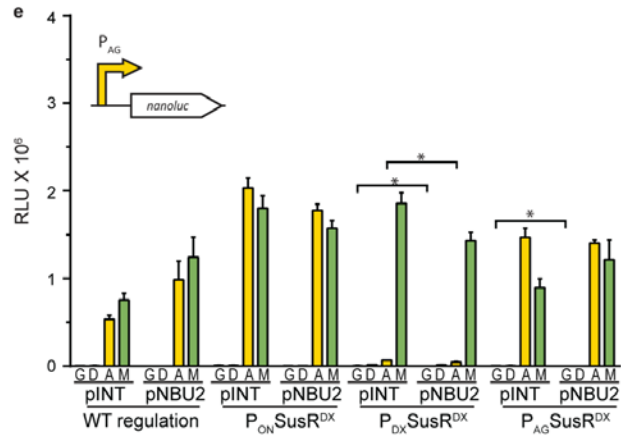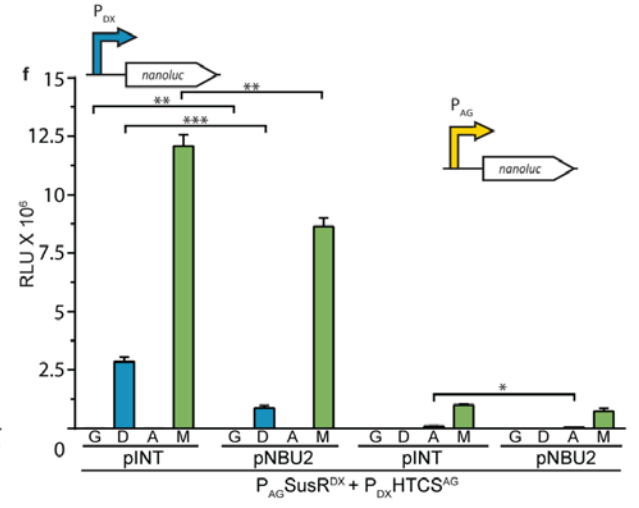

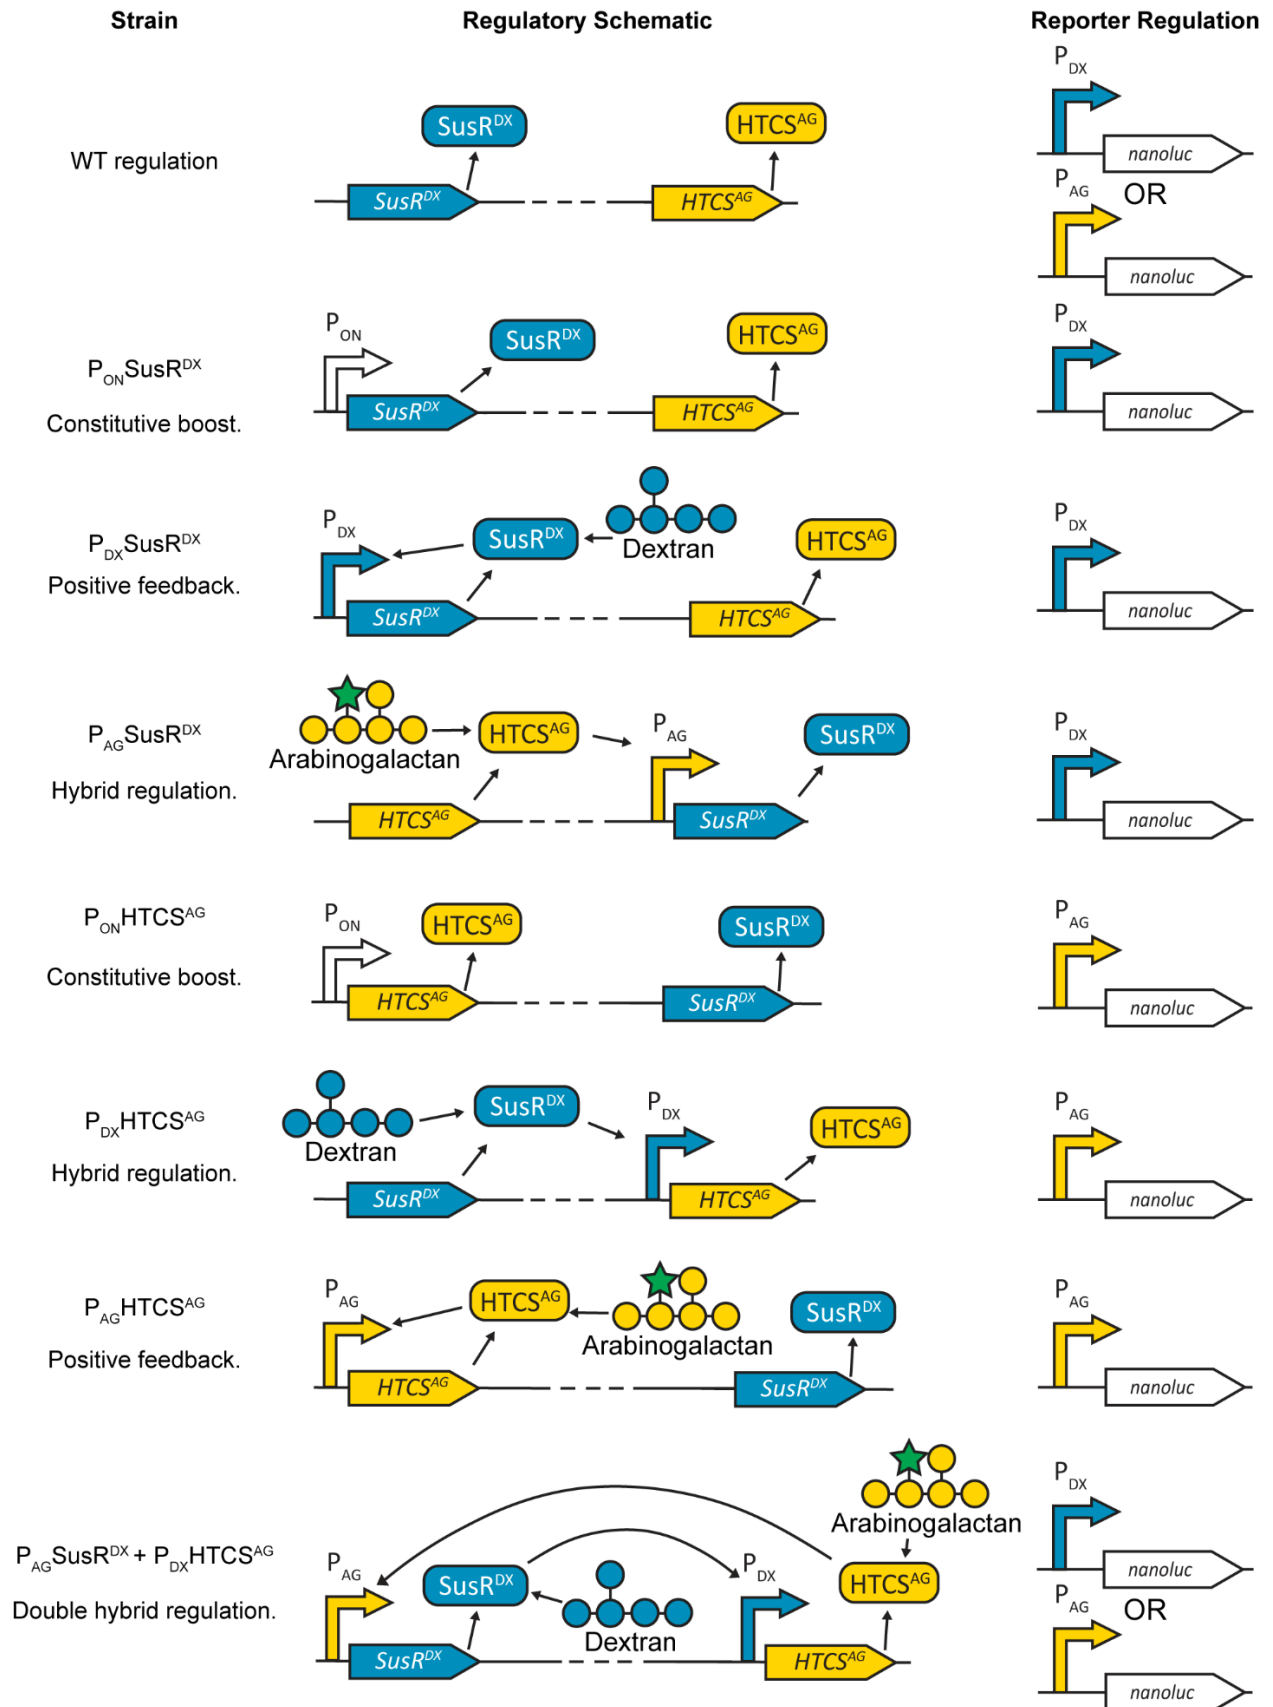

Supplement: 41598_2019_53726_MOESM1_ESM.pdf [file 41598_2019_53726_MOESM1_ESM.pdf]
